# Supplementary material
Source: PubMed Central journal article supplement (PMC4673604)
Supplement: pr5b00746_si_001.pdf [file pr5b00746_si_001.pdf]

## COMPARISONS OF *CAENORHABDITIS* FUCOSYLTRANSFERASE MUTANTS REVEAL A MULTIPLICITY OF ISOBARIC N-GLYCAN STRUCTURES

Shi Yan (闫石), Chunsheng Jin (金春生), Iain B. H. Wilson and Katharina Paschinger

Department für Chemie, Universität für Bodenkultur, 1190 Wien, Austria

Institutionen för Biomedicin, Göteborgs universitet, 405 30 Göteborg, Sweden

### Supplementary Information

Supplementary Figure S-1: Genotypes of the obtained double fucosyltransferase mutants.

Supplementary Figure S-2: MS/MS spectra of selected N-glycans from the double fucosyltransferase mutants.

Supplementary Figure S-3: Exoglycosidase digestion of two forms of Hex<sub>3</sub>HexNAc<sub>2</sub>Fuc<sub>1</sub> of the *fut-6;fut-8* mutant.

Supplementary Figure S-4. Structural analyses of HF-treated glycans from the *fut-1;fut-8* strain.

Supplement Figure S-5: Sequential treatments of a Hex<sub>4</sub>HexNAc<sub>2</sub>Fuc<sub>2</sub> glycan from the *fut-1;fut-8* strain.

Supplementary Figure S-6: 2D-HPLC analyses of *fut-1;fut-6* N-glycans.

Supplementary Figure S-7: Sequential digestions of a predominant N-glycan from the *fut-1;fut-6* strain.

Supplementary Figure S-8: Relationship between retention time and mass of N-glycans from double and triple fucosyltransferase deletion mutants.

Supplementary Figure S-9. Predicted models of selected bisected N-glycans.

Supplementary Table S-1. Summary of evidence for the proposed structures of N-glycans from *Caenorhabditis* double fucosyltransferase deletion mutants.  
(Pages S-11 ff.)

**Supplementary Figure S-1: Genotypes of the obtained double fucosyltransferase mutants.** The homozygous genotype of the *fut-1;fut-6* (F1F6) double mutant, with deletions in both the *fut-1* and *fut-6* genes, was verified by genomic PCR using *fut-1* and *fut-6*-specific forward and reverse primers (left panel). The *fut-1;fut-8* (F1F8) and *fut-6;fut-8* (F6F8) double mutants were examined by multiplex PCR, using relevant forward (F), internal (M) and reverse (R) primers specific for two genes; as judged from the size of the amplicons (listed below), the deletions in both genes were verified in both double mutants (middle and right panels).

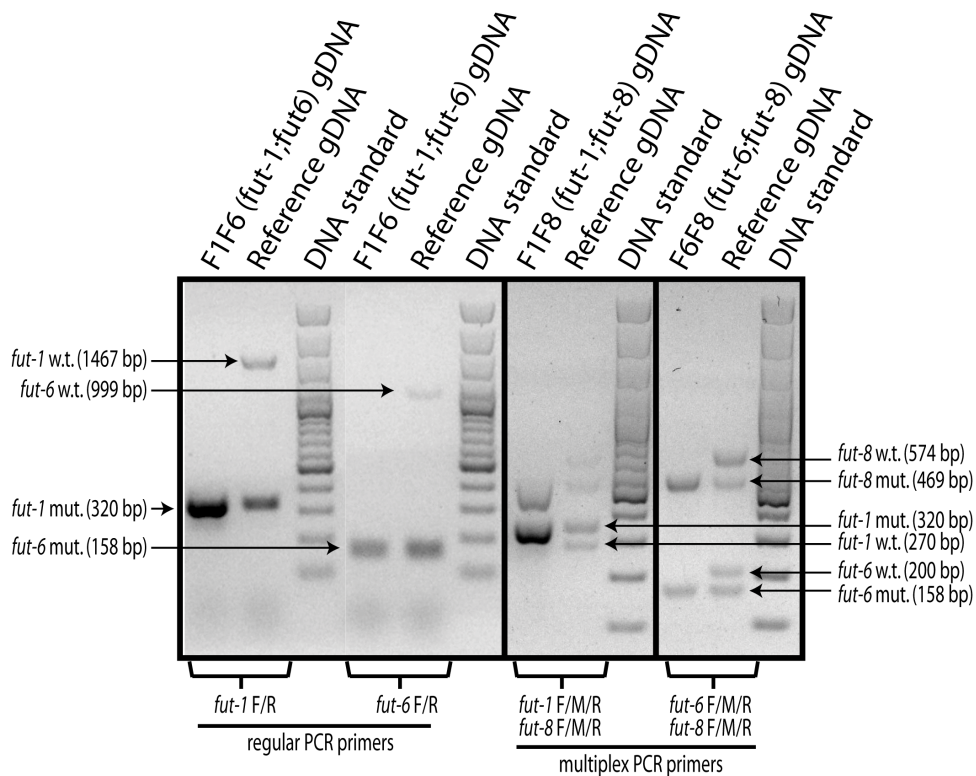

Fucosyltransferase mutations and primer sets used in genotyping PCRs

| Gene         | Allele | Strain | Nucleotide change                         | Primers | Product size             |
|--------------|--------|--------|-------------------------------------------|---------|--------------------------|
| <i>fut-1</i> | ok892  | VC585  | 1147 bp deletion with insertion of AAAGAA | F+R     | 1467(w.t.) 320(deletion) |
|              |        |        |                                           | F+M+R   | 270(w.t.) 320(deletion)  |
| <i>fut-6</i> | ok475  | RB706  | 841 bp deletion                           | F+R     | 999(w.t.) 158(deletion)  |
|              |        |        |                                           | F+M+R   | 200(w.t.) 158(deletion)  |
| <i>fut-8</i> | ok2558 | RB1945 | 2239 bp deletion                          | F+M+R   | 574(w.t.) 469(deletion)  |

**Supplementary Figure S-2: MS/MS spectra of selected N-glycans from the double fucosyltransferase mutants.** Methylated structures ( $\text{Hex}_{2-4}\text{HexNAc}_2\text{Fuc}_{1-2}\text{Me}_{1-4}\text{-PA}$ ) in the three mutants (*fut-1;fut-6* F digest, F1F6F; *fut-1;fut-8* F digest, F1F8F; *fut-6;fut-8* A digest, F6F8A) are shown in panels A-E, while selected structures identified in the *fut-1;fut-6* mutant are arranged according to mass in panels F-T. Key fragments are annotated according to the nomenclature of the Consortium for Functional Glycomics; in the general, either the core fragment Y-ions (e.g., 446, 460 through to 770) or ions resulting from loss of the substituted core fucose (indicated by  $\Delta$  m/z values) are observed. In case of distal GlcNAc modifications, diagnostic fragments resulting from rearrangements only observed in the *fut-1;fut-8* mutant are indicated in red dashed boxes.

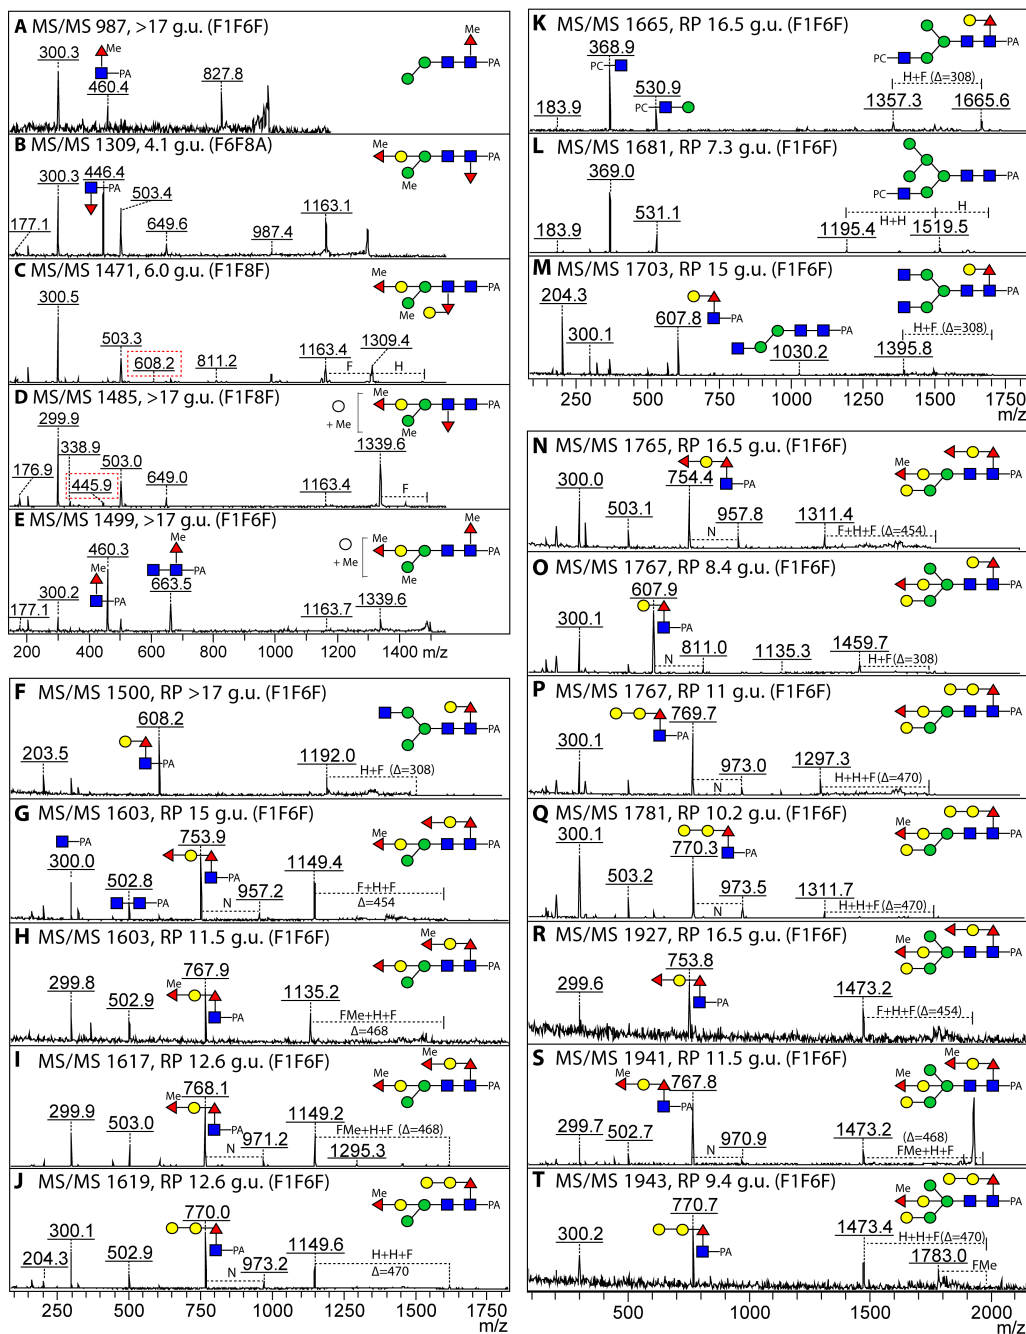

**Supplementary Figure S-3: Exoglycosidase digestion of two forms of Hex<sub>3</sub>HexNAc<sub>2</sub>Fuc<sub>1</sub> of the *fut-6;fut-8* mutant.** Two RP-HPLC fractions (2.8 g.u., A-C, and 4.9 g.u., D-F) containing glycans of  $m/z$  1135 ( $[M+H]^+$ ) were subject to different sequential exoglycosidase treatments (*Aspergillus*  $\beta$ -galactosidase followed by  $\alpha$ 1,2/3-mannosidase or  $\alpha$ 1,2/3-mannosidase followed by  $\alpha$ 1,6-specific mannosidase) to yield products of  $m/z$  811; the degree of sodiation depends on the components in the enzyme preparations used. MS/MS indicated the presence of  $m/z$  446 core fragment ions (see **Supplementary Table**). The two isomers can thereby be distinguished as having either a bisecting galactose or an  $\alpha$ 1,6-mannose on a core fucosylated form of Man<sub>2</sub>GlcNAc<sub>2</sub>.

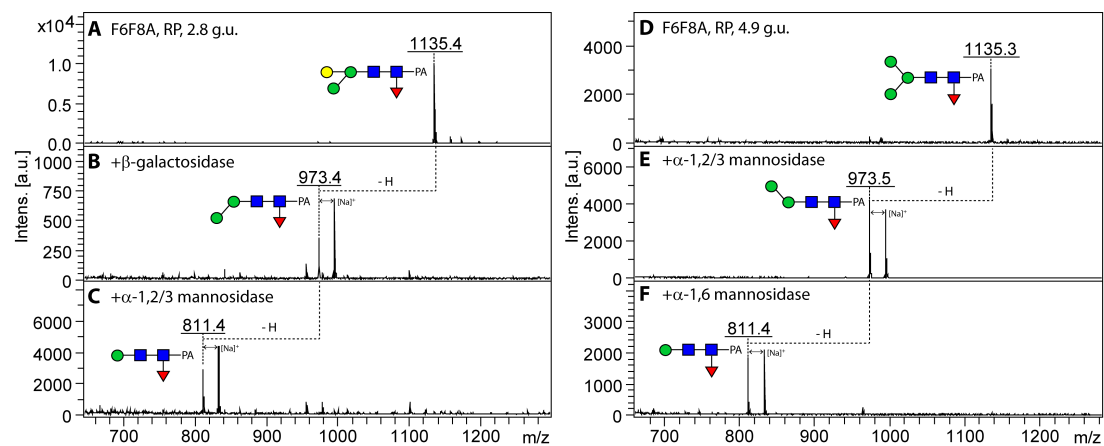

**Supplementary Figure S-4. Structural analyses of HF-treated glycans from the *fut-1;fut-8* strain.** The RP-HPLC fraction eluting at 5.5 g.u. (see Figure 4A in the main text) was treated with hydrofluoric acid which resulted in a degradation of glycans down to Hex<sub>3</sub>HexNAC<sub>2</sub>Fuc<sub>0-1</sub>Me<sub>0-1</sub>-PA (compare panels A and B) due to loss of distal fucosylation and partial loss of  $\alpha$ 1,2-fucose on the bisecting galactose. An aliquot of the HF-treated fraction was re-injected onto the RP-HPLC column to compare with the elution properties of a previously-studied 5.2 g.u. N-glycan structure (Hex<sub>3</sub>HexNAC<sub>2</sub>Fuc<sub>1</sub>Me<sub>1</sub>-PA, *m/z* 1149), isolated from the triple fucosyltransferase mutant (*fut-1;fut-6;fut-8* PNGase F release; compare C and D). The dashed arrow in C indicates the original elution position at 5.5 g.u.

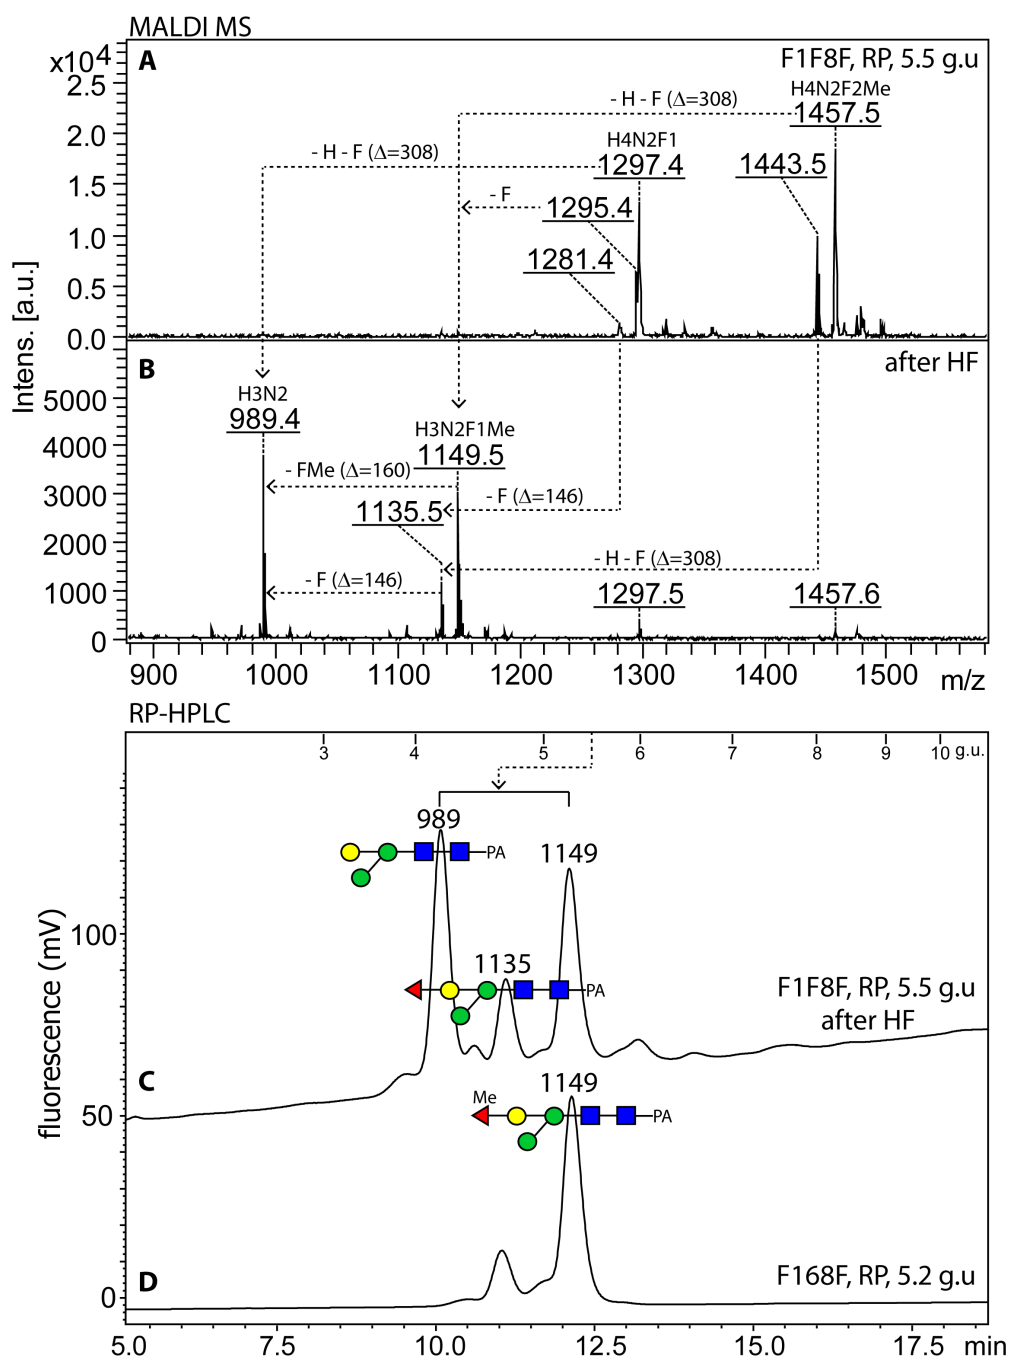

**Supplement Figure S-5: Sequential treatments of a Hex<sub>4</sub>HexNAc<sub>2</sub>Fuc<sub>2</sub> glycan from the *fut-1;fut-8* strain.** The 2D-HPLC fraction (HIAX fraction 5 of the 5.5 g.u. RP-HPLC fraction; A with MS/MS in E) was treated sequentially with (B) jack bean  $\alpha$ -mannosidase, (C) hydrofluoric acid and then (D) *Aspergillus*  $\beta$ -galactosidase. The major product of  $m/z$  827 was observed alongside an intermediate one of  $m/z$  1135 (for MS/MS, see insets) resulting from incomplete release of the fucose by the chemical treatment. The rearranged fragment ion at  $m/z$  608 (highlighted in a red dashed box; absent after hydrofluoric acid treatment) and the serial loss of hexose and fucose from the parent ion are diagnostic of the distal modification.

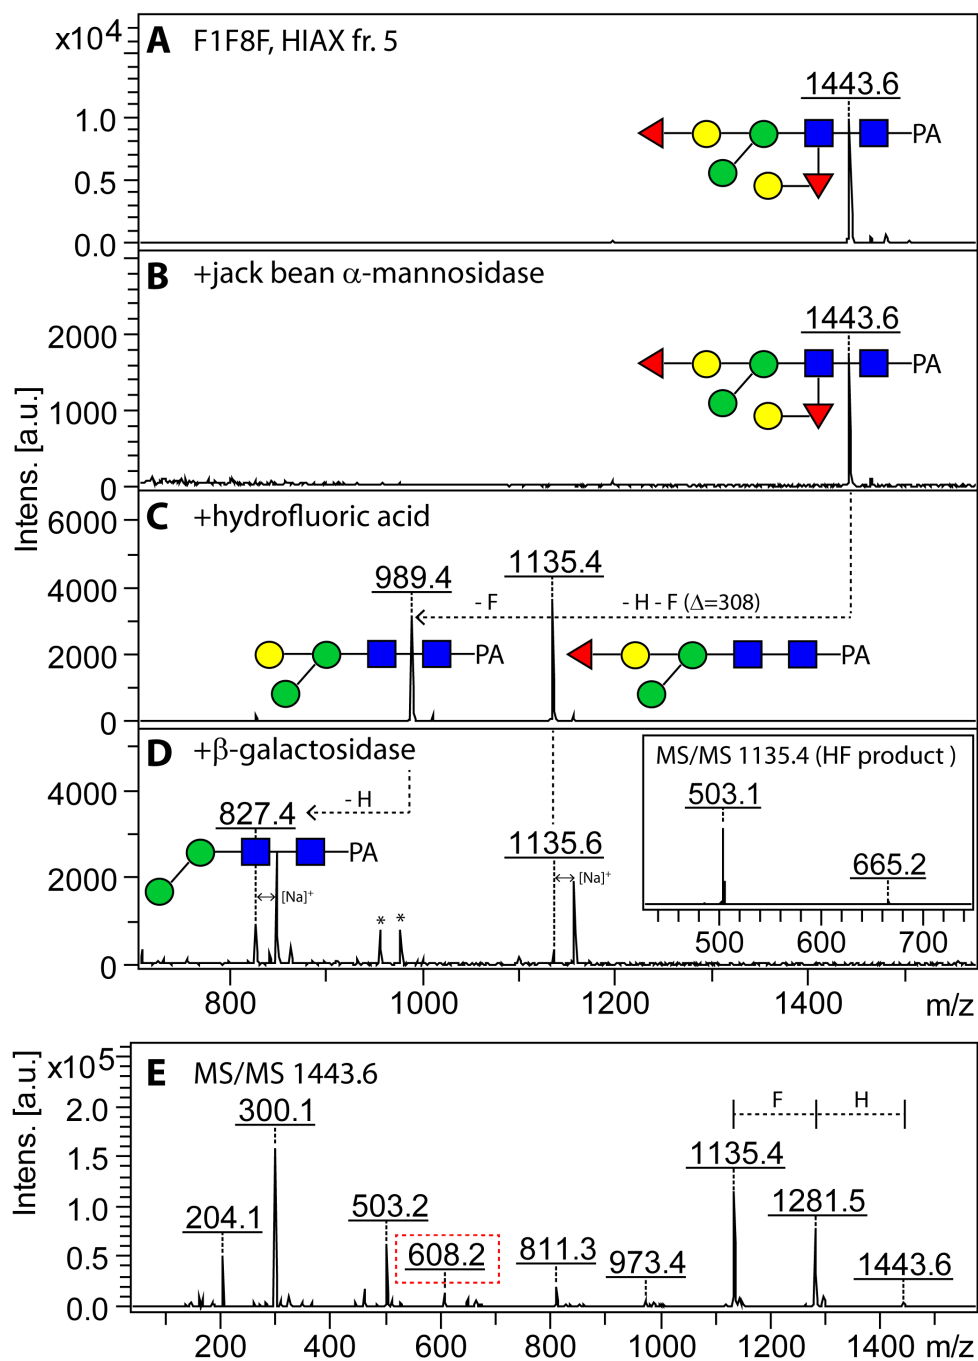

**Supplementary Figure S-6: 2D-HPLC analyses of *fut-1*;*fut-6* N-glycans.** Selected NP-HPLC fractions (I to VIII) were collected, dried and re-fractionated by RP-HPLC. The compositions of major identified glycans were indicated as well as the key MS/MS fragment ions (bold, in brackets). H: hexose; N: *N*-acetylhexosamine; F: fucose; Me: methyl; *m/z* 446: Fuc<sub>1</sub>HexNAC<sub>1</sub>-PA; *m/z* 608: Hex<sub>1</sub>Fuc<sub>1</sub>HexNAC<sub>1</sub>-PA; *m/z* 754: Hex<sub>1</sub>Fuc<sub>2</sub>HexNAC<sub>1</sub>-PA; *m/z* 768: Hex<sub>1</sub>Fuc<sub>2</sub>HexNAC<sub>1</sub>Me<sub>1</sub>-PA; *m/z* 770: Hex<sub>2</sub>Fuc<sub>1</sub>HexNAC<sub>1</sub>-PA; n.c.: no core fucose residues.

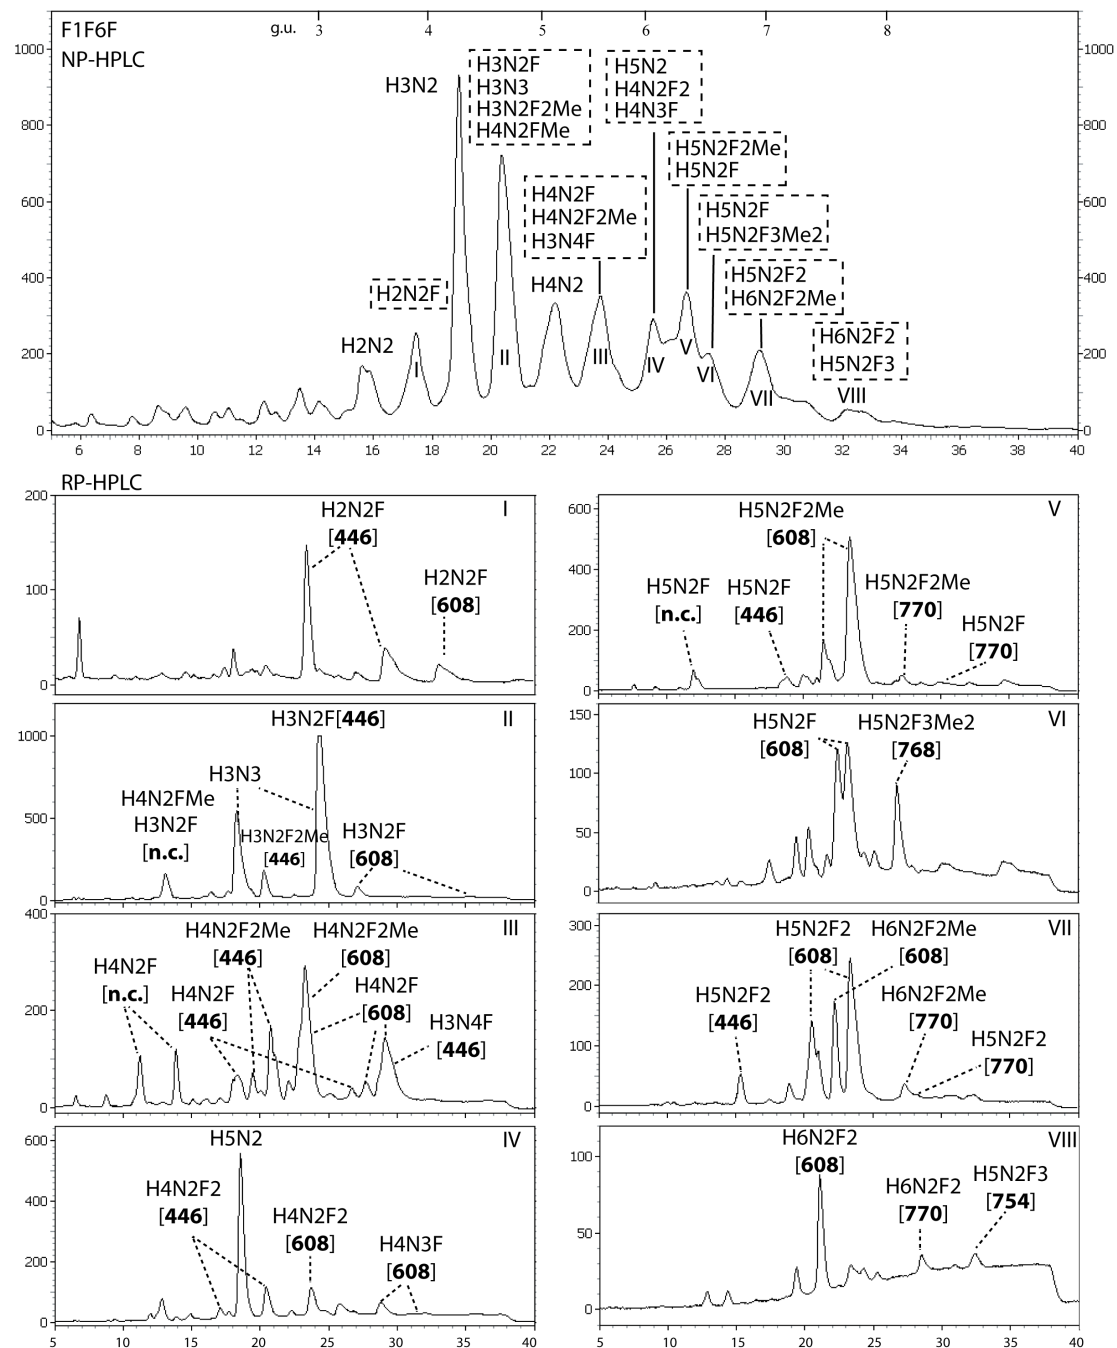

**Supplementary Figure S-7: Sequential digestions of a predominant N-glycan from the *fut-1;fut-6* strain.** The fraction eluting at 10.2 g.u., containing Hex<sub>5</sub>HexNAC<sub>2</sub>Fuc<sub>2</sub>Me<sub>1</sub>-PA (*m/z* 1619) was sensitive to  $\alpha$ -galactosidase digestion (A and B). Sequential treatments of this glycan with HF, jack bean  $\alpha$ -mannosidase, *Aspergillus*  $\beta$ -galactosidase,  $\alpha$ -galactosidase and  $\alpha$ 1,2/3-mannosidase were carried out and resulted in a final product with *m/z* 811 (Hex<sub>1</sub>HexNAC<sub>2</sub>Fuc<sub>1</sub>-PA, C-G). The sequential degradation of *m/z* 1619 glycan is indicated with arrows in red; key MS/MS fragments of the products are displayed in the right panels. Asterisks indicate non-glycan contaminants in the enzyme preparations. Note that, in contrast to the distal GalFuc found in the *fut-1;fut-8* mutant, hydrofluoric acid does not release the proximal GalFuc modification.

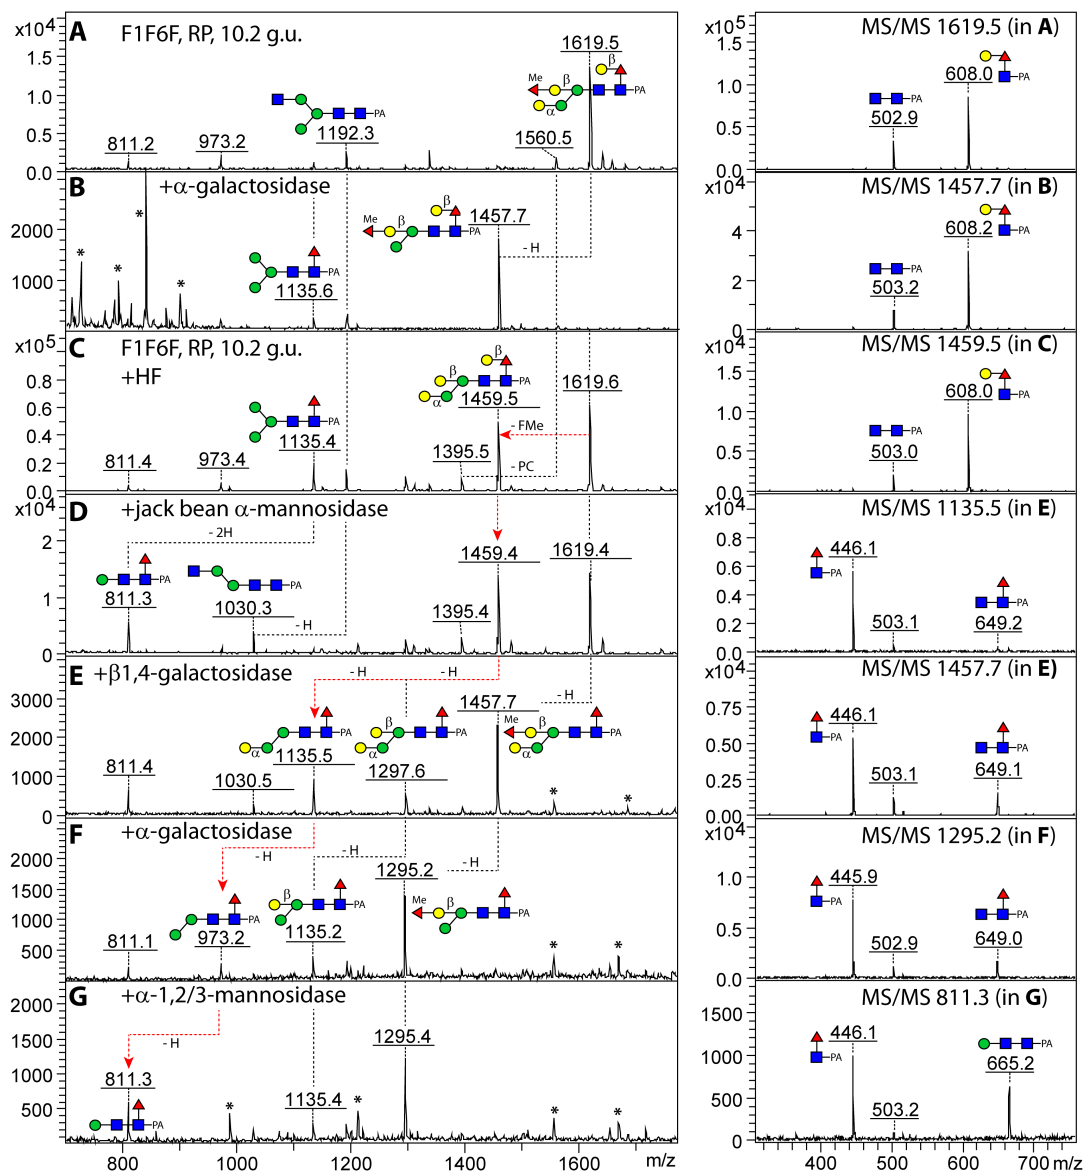



**Supplementary Figure S-8: Relationship between retention time and mass of N-glycans from double and triple fucosyltransferase deletion mutants.** (A) Overall plot of RP-HPLC (C18) retention time (in terms of glucose units; y-axis) and  $m/z$  of the individual glycans (x-axis). Ovals indicate glycans with different core modifications ( $\alpha$ 1,3-fucose on either the proximal or distal GlcNAc,  $\alpha$ 1,6-fucose on the proximal GlcNAc or Gal $\beta$ 1,4Gal $\beta$ 1,4Fuc $\alpha$ 1,6 (770 core fragment), Fuc $\alpha$ 1,2Gal $\beta$ 1,4Fuc $\alpha$ 1,6 (754 core fragment), MeFuc $\alpha$ 1,2Gal $\beta$ 1,4Fuc $\alpha$ 1,6 (768 core fragment) modifications of the reducing terminal GlcNAc. (B-E) Individual scatter plots with a comparison of PNGase F released glycans of the triple mutant and the *fut-6;fut-8* strain in panel E highlighting the similarity of the glycan pools in these two preparations.

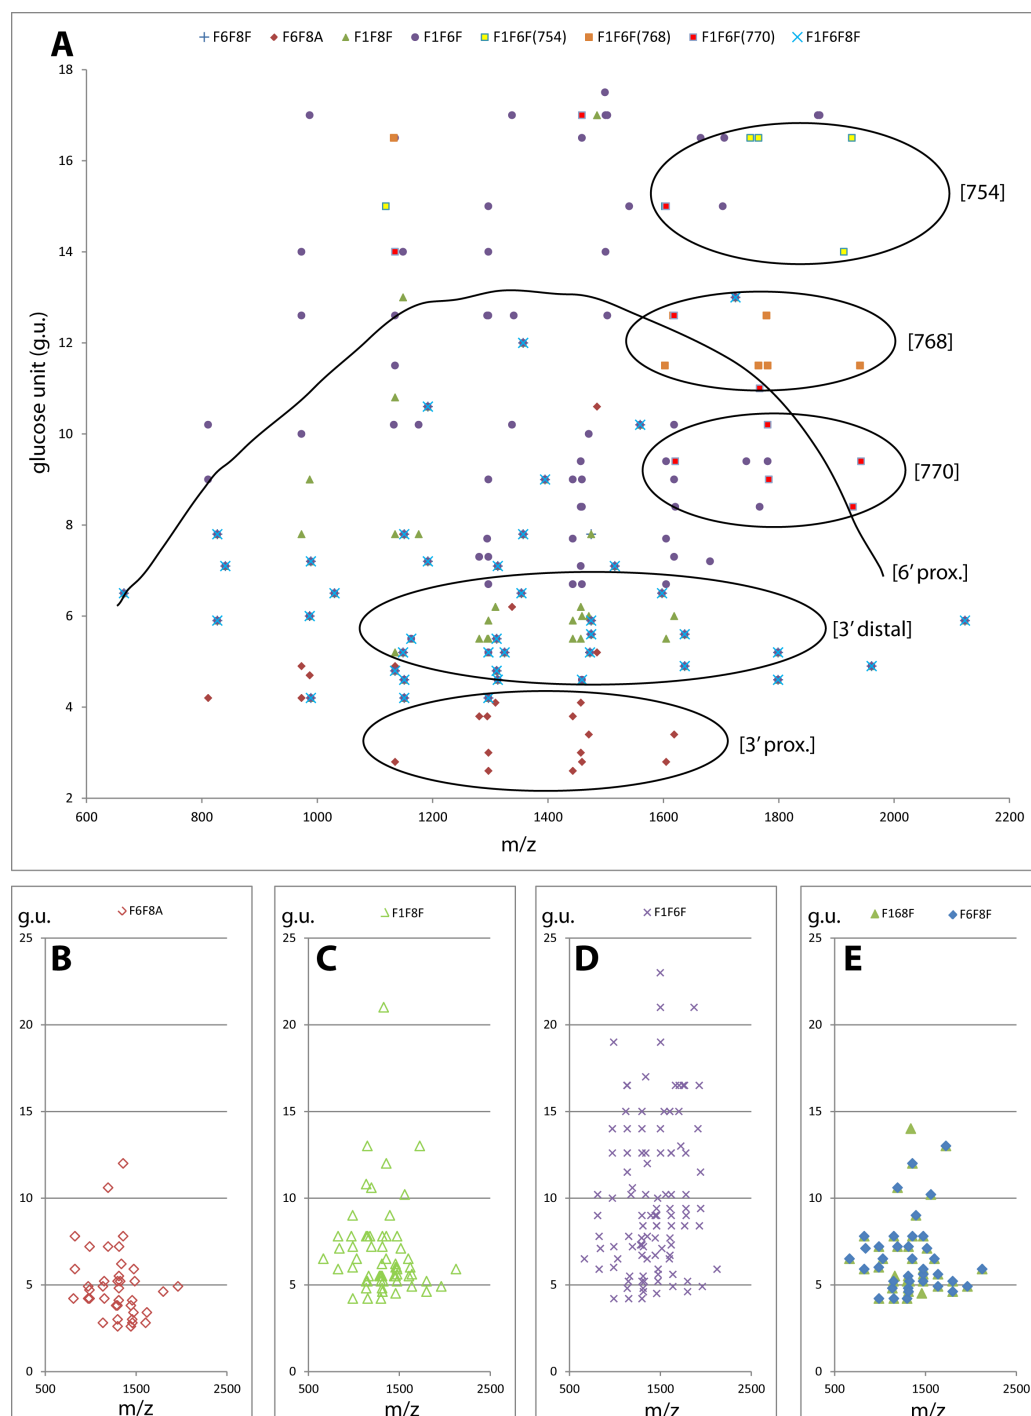

**Supplementary Figure S-9. Predicted models of selected bisected N-glycans.** 3D structures of glycans with compositions of  $\text{Hex}_{3-5}\text{HexNAc}_2\text{Fuc}_{0-3}$  were simulated using Carbohydrate Builder (<http://glycam.org/tools/molecular-dynamics/oligosaccharide-builder/build-glycan?id=1>) which was developed by Dr. Robert Woods' group and exported as PDB files; the 3D structures were visualised using Jmol 13.0 software. Colour codes of atoms are: grey as carbon, red as oxygen, white as proton and blue as nitrogen. The ringed monosaccharides on the CFG structures are marked in yellow on the 3D models. Close proximity of the bisecting galactose to the distal fucose, leading to reduced  $\beta$ -galactosidase sensitivity (see, *e.g.*, Figure 5C in the main text), is highlighted in panels B and C with an arrow. The space between the bisecting galactose and  $\alpha$ 1,6-mannose (F, also highlighted with an arrow) is larger and so the latter has less of an effect on the action of the  $\beta$ -galactosidase. On the other hand, the  $\alpha$ 1,6-mannose is close to the  $\alpha$ 1,2-fucose linked to the bisect (G), which may correlate with the reduced hydrolysis by bovine  $\alpha$ -fucosidase as compared to the structures in panels H and I.

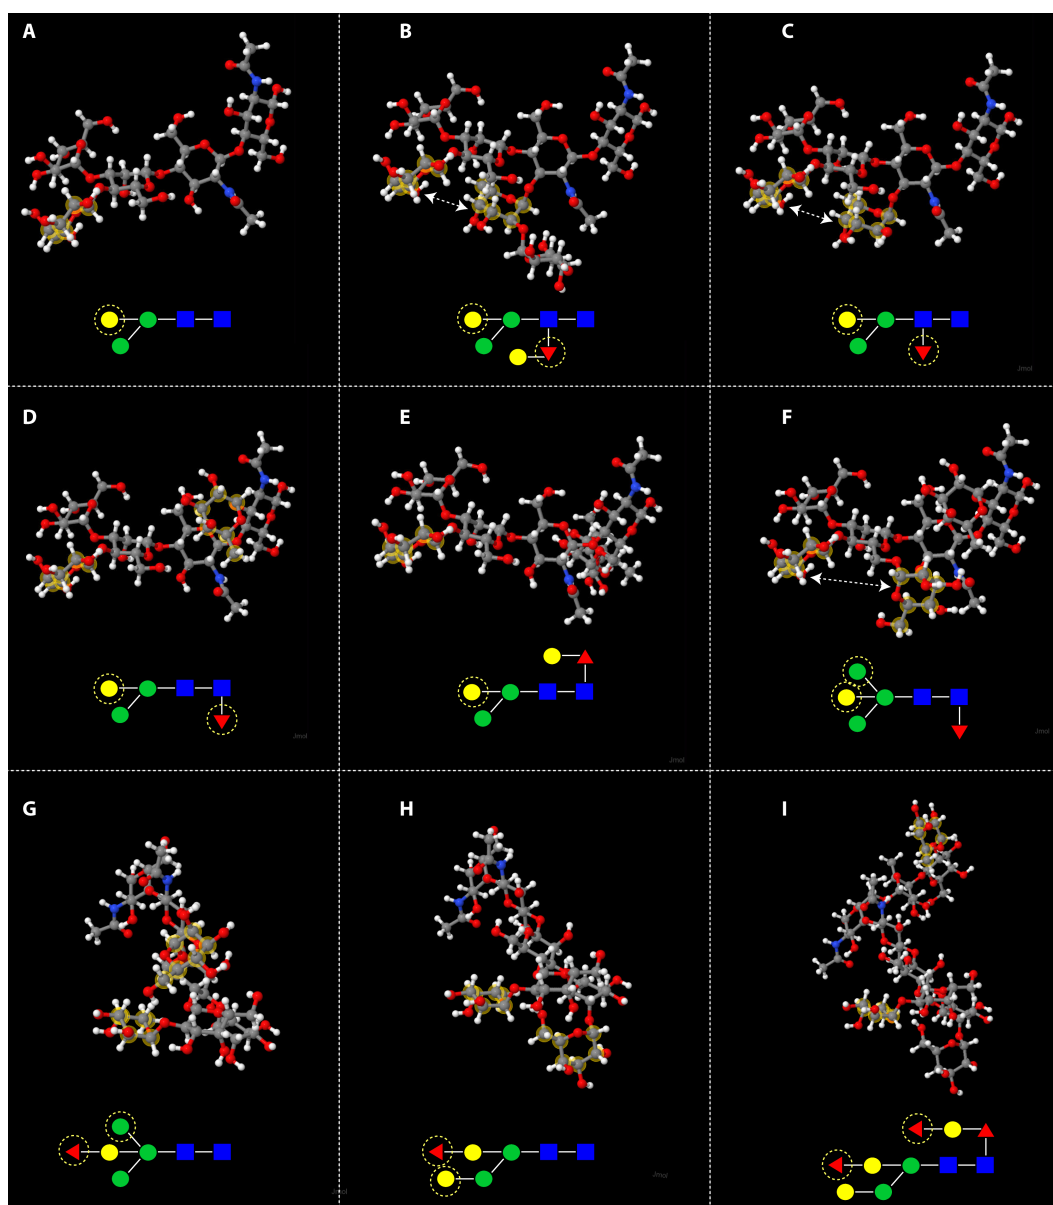

**Supplementary Table S-1. Summary of evidence for the proposed structures of N-glycans from *Caenorhabditis* double fucosyltransferase deletion mutants.** This extended Table presents brief summaries of the evidence for the proposed structures (including calculated  $m/z$  of the pyridylaminated glycans, retention on the RP C18 column in terms of glucose units, observed key fragments and sensitivities to enzymes) referring also to relevant figures, supplementary figures and comparisons with the triple fucosyltransferase mutant, the *pmk-1* strain and *Pristionchus* (Yan *et al*, 2015; Refs. 13 and 25). The qualitative indication of abundance (trace through to +++) is judged by the fluorescence intensity.

**Table I: List of predicted N-glycans for *C. elegans* double *FUT* knockouts**

| Structures                                                                          | <i>m/z</i> , PA, [M+H] <sup>+</sup> ; Composition; g.u. | F6F8 F | F6F8 A | F1F8 F | F1F6 F | Evidence                                                                                                                                                            |
|-------------------------------------------------------------------------------------|---------------------------------------------------------|--------|--------|--------|--------|---------------------------------------------------------------------------------------------------------------------------------------------------------------------|
| 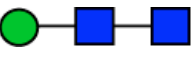   | 665.28<br>H1N2<br>6.5                                   | trace  |        | trace  | trace  | Key fragments: 300, 503<br>Co-elution with <i>Pristionchus</i> and F168 strain                                                                                      |
|    | 811.35<br>H1N2F1<br>4.2                                 |        | +      |        |        | Key fragment: 446<br>Only found in PNGase A released pool.<br>Co-elution with <i>Pristionchus</i>                                                                   |
|    | 811.35<br>H1N2F1<br>9.0                                 |        |        |        | +      | Key fragments: 608, 503 (loss of 308)<br>sensitive to β-galactosidase (-1H),<br>then MS/MS frag. 446                                                                |
|    | 811.35<br>H1N2F1<br>10.2                                |        |        |        | +      | Key fragment: 446<br>Co-elution with <i>Pristionchus</i>                                                                                                            |
|    | 827.34<br>H2N2 (0M)<br>5.9                              | ++     | trace  | +++    | ++     | Key fragments: 300, 665<br>Co-elution with <i>Pristionchus</i> , F168 and <i>pmk-1</i> strains                                                                      |
|   | 827.34<br>H2N2 (M0)<br>7.8                              | ++     | +      | ++     | +      | Key fragments: 300, 665<br>Co-elution with <i>Pristionchus</i> , F168 and <i>pmk-1</i> strains                                                                      |
|  | 841.36<br>H2N2Me1<br>7.1                                | trace  |        | trace  | +      | Key fragments: 177, 665<br>Co-elution with F168 strain<br>retarded elution compared to 827 at 5.9 g.u.                                                              |
|  | 973.40<br>H2N2F1 (0MF <sup>3</sup> )<br>4.2             |        | ++     |        |        | Key fragments: 446, 827<br>Only found in PNGase A released pool.<br>Co-elution with <i>Pristionchus</i><br>sensitive to α1,2/3 mannosidase (-1H)                    |
|  | 973.40<br>H2N2F1 (M0F <sup>3</sup> )<br>4.9             |        | +      |        |        | Key fragments: 446, 827<br>Only found in PNGase A released pool.<br>Co-elution with <i>Pristionchus</i><br>sensitive to α1,6 mannosidase (-1H)                      |
|  | 973.40<br>H2N2F1<br>7.8                                 |        |        | +      |        | Key fragments: trace amount of 446 fragment due to rearrangement, 827 (loss of 146)<br>Co-elution with <i>Pristionchus</i><br>sensitive to α1,2/3 mannosidase (-1H) |
|  | 973.40<br>H2N2F1 (0MF <sup>6</sup> )<br>10.0            |        |        |        | +++    | Key fragments: 446, 827<br>Co-elution with <i>Pristionchus</i> and <i>pmk-1</i> strain<br>resistant to α1,6 mannosidase;<br>sensitive to α1,2/3 mannosidase (-1H)   |
|  | 973.40<br>H2N2F1 (M0F <sup>6</sup> )<br>12.6            |        |        |        | ++     | Key fragments: 446, 827<br>Co-elution with <i>Pristionchus</i> and <i>pmk-1</i> strain<br>resistant to α1,2/3 mannosidase;<br>sensitive to α1,6 mannosidase (-1H)   |
|  | 973.40<br>H2N2F1<br>14.0                                |        |        |        | +      | Key fragments: 608, 665 (loss of 308)<br>sensitive to β-galactosidase (-1H),<br>then MS/MS frag. 446                                                                |



|  |                                                  |       |       |       |       |                                                                                                                                                                                                                                                                                                          |
|--|--------------------------------------------------|-------|-------|-------|-------|----------------------------------------------------------------------------------------------------------------------------------------------------------------------------------------------------------------------------------------------------------------------------------------------------------|
|  | 1135.45<br>H3N2F1<br>5.2                         |       |       | +++   |       | Key fragments: trace 446 due to re-arrangement, 989 (loss of 146)<br>sensitive to Bov. $\alpha$ -fucosidase (-1F);<br>sensitive to $\beta$ -galactosidase (-1H)                                                                                                                                          |
|  | 1135.45<br>H3N2F1<br>7.8                         |       |       | +     |       | Key fragments: trace 446 due to re-arrangement, 989 (loss of 146)<br>resistant to $\beta$ -galactosidase;<br>sensitive to $\alpha$ -galactosidase (-1H)                                                                                                                                                  |
|  | 1135.45<br>H3N2F1<br>10.8                        |       |       | ++    |       | Key fragments: trace 608, due to re-arrangement, 827 (loss of 308)<br>sensitive to J.B. mannosidase (-1H);<br>sensitive to $\alpha$ 1,2/3 mannosidase (-1H)                                                                                                                                              |
|  | 1135.45<br>H3N2F1<br>(MMF <sup>6</sup> )<br>11.5 |       |       | ++++  |       | Key fragments: 446, 989<br>Co-elution with <i>Pristionchus</i> and <i>pmk-1</i> strain<br>sensitive to $\alpha$ 1,2/3 mannosidase (-1H)                                                                                                                                                                  |
|  | 1135.45<br>H3N2F1<br>12.6                        |       |       | ++    |       | Key fragments: 608, 827 (loss of 308)<br>resistant to $\alpha$ 1,6 mannosidase;<br>sensitive to $\beta$ -galactosidase (-1H),<br>then MS/MS frag. 446;<br>sensitive to $\alpha$ 1,2/3 mannosidase (-1H)                                                                                                  |
|  | 1135.45<br>H3N2F1<br>14.0                        |       |       | trace |       | Key fragments: 770, 665 (loss of 470)                                                                                                                                                                                                                                                                    |
|  | 1135.45<br>H3N2F1<br>16.5                        |       |       | +     |       | Key fragments: 608, 827 (loss of 308)<br>sensitive to $\alpha$ 1,6 mannosidase (-1H)                                                                                                                                                                                                                     |
|  | 1149.47<br>H3N2F1Me1<br>5.2                      | trace | trace | +     | +     | Key fragments: 300, 503 (no core Fuc), 987<br>Co-elution with F168 strain<br>resistant to J.B. mannosidase, Bov. $\alpha$ -fucosidase and<br>$\beta$ -galactosidase;<br>sensitive to HF (-160),<br>then sensitive to $\beta$ -galactosidase (-1H),<br>then sensitive to $\alpha$ 1,2/3 mannosidase (-1H) |
|  | 1149.47<br>H3N2F1Me1<br>7.8                      |       | trace |       |       | Key fragments: 446, 827, 1003<br>Only found in PNGase A released pool.                                                                                                                                                                                                                                   |
|  | 1149.47<br>H3N2F1Me1<br>13.0                     |       |       | +     |       | Key fragments: trace 608 due to re-arrangement,<br>841 (loss of 308)                                                                                                                                                                                                                                     |
|  | 1149.47<br>H3N2F1Me1<br>14.0                     |       |       |       | +     | Key fragments: 446, 1003<br>resistant to $\alpha$ -galactosidase and $\beta$ -galactosidase;<br>sensitive to J.B. mannosidase (-1H)                                                                                                                                                                      |
|  | 1151.45<br>H4N2<br>4.2                           | ++    | +     | +++   | ++    | Key fragments: 300, 503<br>Co-elution with F168 and <i>pmk-1</i> strains<br>resistant to J.B. mannosidase;<br>sensitive to $\beta$ -galactosidase (-1H),<br>then sensitive to $\alpha$ 1,2/3 mannosidase (-1H)                                                                                           |
|  | 1151.45<br>H4N2<br>4.6                           | trace |       | trace | trace | Key fragments: 300, 503<br>Co-elution with F168 and <i>pmk-1</i> strains<br>sensitive to $\alpha$ -galactosidase (-1H);<br>sensitive to $\beta$ -galactosidase (-1H),                                                                                                                                    |

|  |                                  |     |       |       |       |                                                                                                                                                                                                                                                                                        |
|--|----------------------------------|-----|-------|-------|-------|----------------------------------------------------------------------------------------------------------------------------------------------------------------------------------------------------------------------------------------------------------------------------------------|
|  | 1151.45<br>H4N2<br>7.8           | +   |       | +     | trace | Key fragment: 827<br>Co-elution with F168 strain and <i>pmk-1</i> strains resistant to $\alpha$ 1,6 mannosidase; sensitive to J.B. mannosidase (-3H) or $\alpha$ 1,2/3 mannosidase (-1H)                                                                                               |
|  | 1163.48<br>H3N2F1Me2<br>5.5      |     |       | trace | trace | Key fragments: 177, 503 ( no core Fuc), 987, 1003<br>Co-elution with F168 strain                                                                                                                                                                                                       |
|  | 1176.48<br>H2N3F1<br>7.8         |     |       | +     |       | Key fragments: trace 446 due to re-arrangement, 1030 (loss of 146)<br>Co-elution with <i>hex-2;hex-3</i> strain                                                                                                                                                                        |
|  | 1176.48<br>H2N3F1<br>10.2        |     |       |       | trace | Key fragments: 446, 1030<br>Co-elution with <i>Pristionchus</i>                                                                                                                                                                                                                        |
|  | 1192.47<br>H3N3<br>(MGn)<br>7.2  | +++ | trace | +++   | ++    | Key fragments: 365, 1030<br>Co-elution with <i>Pristionchus</i> , F168 and <i>pmk-1</i> strains resistant to $\alpha$ 1,2/3 mannosidase; sensitive to FDL (-1N)                                                                                                                        |
|  | 1192.47<br>H3N3<br>(GnM)<br>10.6 | ++  | +     | ++    | ++    | Key fragments: 365, 989<br>Co-elution with <i>Pristionchus</i> , F168 and <i>pmk-1</i> strains sensitive to $\alpha$ 1,2/3 mannosidase (-1H)                                                                                                                                           |
|  | 1281.51<br>H3N2F2<br>3.8         |     | ++    |       |       | Key fragments: 446, 973, 1135<br>Only found in PNGase A released pool. sensitive to $\alpha$ 1,2 fucosidase (-1F) MS/MS then still 446; sensitive to HF (-2x146), then sensitive to $\beta$ -galactosidase (-1H), then sensitive to $\alpha$ 1,2/3 mannosidase (-1H); <b>Fig. 3F-J</b> |
|  | 1281.51<br>H3N2F2<br>5.5         |     |       | +     |       | Key fragments: trace 446 due to re-arrangement, 1135 (loss of 146)                                                                                                                                                                                                                     |
|  | 1281.51<br>H3N2F2<br>7.3         |     |       |       | +     | Key fragments: 446, 1135<br>resistant to J.B. mannosidase; sensitive to Bov. $\alpha$ -fucosidase (-2F)                                                                                                                                                                                |
|  | 1295.52<br>H3N2F2Me1<br>3.8      |     | ++    |       |       | Key fragments: 446, 1149<br>Only found in PNGase A released pool. Co-elution with <i>pmk-1</i> strain PNGase A released sensitive to HF (-160 and -146), then sensitive to $\beta$ -galactosidase (-1H), then sensitive to $\alpha$ 1,2/3 mannosidase (-1H); <b>Fig. 3F-J</b>          |
|  | 1295.52<br>H3N2F2Me1<br>5.5      |     |       | +++   |       | Key fragments: trace 446 due to re-arrangement, 1149 (loss of 146)<br>sensitive to HF (-160 and -146), then sensitive to $\beta$ -galactosidase (-1H)                                                                                                                                  |
|  | 1295.52<br>H3N2F2Me1<br>7.7      |     |       |       | ++    | Key fragments: 446, 1135, 1149<br>resistant to $\alpha$ -galactosidase and $\beta$ -galactosidase                                                                                                                                                                                      |
|  | 1295.52<br>H3N2F2Me1<br>12.6     |     |       |       | trace | Key fragments: 608, 987 (loss of 308)                                                                                                                                                                                                                                                  |

|                                                                                     |                           |   |      |     |    |                                                                                                                                                                                                                                                                                                                                                                                    |
|-------------------------------------------------------------------------------------|---------------------------|---|------|-----|----|------------------------------------------------------------------------------------------------------------------------------------------------------------------------------------------------------------------------------------------------------------------------------------------------------------------------------------------------------------------------------------|
| 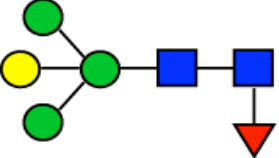   | 1297.50<br>H4N2F1<br>2.6  |   | ++++ |     |    | Key fragments: 446, 1151; <b>MS/MS Fig. 2A</b><br>Only found in PNGase A released pool.<br>Co-elution with <i>pmk-1</i> strain PNGase A released<br>resistant to J.B. mannosidase and $\alpha$ -galactosidase;<br>sensitive to $\beta$ -galactosidase (-1H),<br>then sensitive to $\alpha$ 1,2/3 mannosidase (-1H) and then to<br>$\alpha$ 1,6 mannosidase (-1H); <b>Fig. 3A-E</b> |
|    | 1297.50<br>H4N2F1<br>3.0  |   | +    |     |    | Key fragments: 446, 1151<br>Only found in PNGase A released pool.<br>Co-elution with <i>pmk-1</i> strain PNGase A released<br>sensitive to $\alpha$ -galactosidase (-1H);<br>sensitive to $\beta$ -galactosidase (-1H)                                                                                                                                                             |
|    | 1297.50<br>H4N2F1<br>4.2  | + |      | +++ | ++ | Key fragments: 300, 503 (no core Fuc); <b>MS/MS Fig. 2B</b><br>Co-elution with F168 and <i>pmk-1</i> strains<br>resistant to $\alpha$ -galactosidase;<br>sensitive to HF (-146),<br>then sensitive to $\beta$ -galactosidase (-1H),<br>then sensitive to $\alpha$ 1,2/3 mannosidase (-1H)                                                                                          |
|    | 1297.50<br>H4N2F1<br>5.2  |   |      | +   | ++ | Key fragments: 300, 503 (no core Fuc), 973<br>Co-elution with F168 strain<br>sensitive to $\alpha$ -galactosidase (-1H);<br>sensitive to HF (-146) or to Bov. $\alpha$ -fucosidase (-1F)<br>then sensitive to $\beta$ -galactosidase (-1H)                                                                                                                                         |
|    | 1297.50<br>H4N2F1<br>5.2  |   | +    |     |    | Key fragments: 446, 1151<br>Only found in PNGase A released pool.<br>sensitive to $\alpha$ -galactosidase (-1H);<br>sensitive to J.B. mannosidase (-1H)                                                                                                                                                                                                                            |
|    | 1297.50<br>H4N2F1<br>5.5  |   |      | +++ |    | Key fragments: trace 608 due to re-arrangement,<br>989 (loss of 308); <b>MS/MS Fig. 2C</b><br>sensitive to $\beta$ -galactosidase (-1H);<br>sensitive to HF (-308); <b>Fig. 5A-F</b>                                                                                                                                                                                               |
|   | 1297.50<br>H4N2F1<br>5.9  |   |      | +   |    | Key fragments: trace 446 due to re-arrangement,<br>1151 (loss of 146)<br>Co-elution with <i>pmk-1</i> strain<br>sensitive to $\beta$ -galactosidase (-1H)<br>sensitive to $\alpha$ -galactosidase (-1H)                                                                                                                                                                            |
|  | 1297.50<br>H4N2F1<br>6.7  |   |      |     | ++ | Key fragments: 446, 1151; <b>MS/MS Fig. 2D</b><br>Co-elution with <i>pmk-1</i> strain<br>resistant to $\alpha$ -galactosidase and J.B. mannosidase;<br>sensitive to $\beta$ -galactosidase (-1H)                                                                                                                                                                                   |
|  | 1297.50<br>H4N2F1<br>7.3  |   |      |     | +  | Key fragments: 446, 1151<br>sensitive to $\alpha$ -galactosidase (-1H);<br>sensitive to $\beta$ -galactosidase (-1H)                                                                                                                                                                                                                                                               |
|  | 1297.50<br>H4N2F1<br>9.2  |   |      |     | ++ | Key fragments: 608, 989 (loss of 308)<br>resistant to $\alpha$ -galactosidase, Bov. $\alpha$ -fucosidase and HF;<br>sensitive to $\beta$ -galactosidase (-2H),<br>then MS/MS frag. 446<br><b>Fig. 7D-F</b>                                                                                                                                                                         |
|  | 1297.50<br>H4N2F1<br>12.6 |   |      |     | +  | Key fragments: 446, 1151<br>resistant to $\beta$ -galactosidase;<br>sensitive to J.B. mannosidase (-1H);<br>sensitive to $\alpha$ -galactosidase (-1H),<br>then sensitive to J.B. mannosidase (-2H)                                                                                                                                                                                |
|  | 1297.50<br>H4N2F1<br>14.0 |   |      |     | +  | Key fragments: 608, 989 (loss of 308)<br>sensitive to $\alpha$ -galactosidase (-1H),<br>then sensitive to $\alpha$ 1,2/3 mannosidase (-1H);<br>sensitive to $\beta$ -galactosidase (-1H),<br>then MS/MS frag. 446<br><b>Fig. 7A-C</b>                                                                                                                                              |





|  |                                  |       |       |       |       |                                                                                                                                                                                                                                      |
|--|----------------------------------|-------|-------|-------|-------|--------------------------------------------------------------------------------------------------------------------------------------------------------------------------------------------------------------------------------------|
|  | 1341.53<br>H2N3F1PC1<br>12.6     |       |       |       | trace | Key fragments: 369, 531, 895 (loss of 446)<br>Co-elution with <i>Pristionchus</i>                                                                                                                                                    |
|  | 1354.53<br>H4N3<br>6.5           | trace |       | trace | trace | Key fragment: 1030<br>Co-elution with F168 and <i>pmk-1</i> strain<br>resistant to $\alpha$ -galactosidase and $\beta$ -galactosidase;<br>sensitive to J.B. mannosidase (-2H)                                                        |
|  | 1357.53<br>H3N3PC1<br>7.8        | ++    | +     | ++    | ++    | Key fragments: 369, 531<br>Co-elution with <i>Pristionchus</i> , F168 strain and <i>pmk-1</i> strains<br>sensitive to J.B. mannosidase (-1H)                                                                                         |
|  | 1357.53<br>H3N3PC1<br>12.0       | +     | trace | +     | +     | Key fragments: 369, 531<br>Co-elution with <i>Pristionchus</i> , F168 strain and <i>pmk-1</i> strains<br>sensitive to J.B. mannosidase (-1H)                                                                                         |
|  | 1395.55<br>H3N4<br>(GnGn)<br>9.0 | ++    |       | ++    | ++    | Key fragments: 365, 1030, 1192<br>Co-elution with <i>Pristionchus</i> , F168 strain and <i>pmk-1</i> strains                                                                                                                         |
|  | 1443.56<br>H4N2F2<br>2.6         |       | +++   |       |       | Key fragments: 446, 1297<br>Only found in PNGase A released pool.<br>Co-elution with <i>pmk-1</i> strain PNGase A released<br>resistant to J.B. mannosidase, $\beta$ -galactosidase and<br>$\alpha$ -galactosidase; <b>Fig. 3A-E</b> |
|  | 1443.56<br>H4N2F2<br>3.8         |       | +     |       |       | Key fragments: 446, 973<br>Only found in PNGase A released pool.<br>sensitive to $\alpha$ -galactosidase (-1H);<br>sensitive to HF (-2x146)                                                                                          |
|  | 1443.56<br>H4N2F2<br>5.5         |       |       | +++   |       | Key fragments: trace 608 due to re-arrangement,<br>1135 (loss of 308); <b>MS/MS Suppl. 5E</b><br>sensitive to HF (-308 and -146),<br>then sensitive to $\beta$ -galactosidase (-1H); <b>Suppl. 5A-D</b>                              |
|  | 1443.56<br>H4N2F2<br>5.9         |       |       | +     |       | Key fragments: trace 446 due to re-arrangement,<br>1297 (loss of 146)<br>sensitive to $\alpha$ -galactosidase (-1H);                                                                                                                 |
|  | 1443.56<br>H4N2F2<br>6.7         |       |       |       | +     | Key fragments: 446, 1297<br>Co-elution with <i>pmk-1</i> strain<br>resistant to $\alpha$ -galactosidase and $\beta$ -galactosidase;<br>sensitive to Bov. $\alpha$ -fucosidase (-1F),<br>then MS/MS frag. 300, 503 (no core Fuc)      |
|  | 1443.56<br>H4N2F2<br>7.7         |       |       |       | ++    | Key fragments: 446, 1297<br>resistant to $\beta$ -galactosidase;<br>sensitive to $\alpha$ -galactosidase (-1H);<br>sensitive to Bov. $\alpha$ -fucosidase (-2F),<br>then MS/MS frag. 300, 503 (no core Fuc)                          |
|  | 1443.56<br>H4N2F2<br>9.0         |       |       |       | ++    | Key fragments: 608, 1135 (loss of 308)<br>resistant to J.B. mannosidase and $\alpha$ -galactosidase;<br>sensitive to $\beta$ -galactosidase (-1H),<br>then MS/MS frag. 446                                                           |



|  |                              |       |       |    |       |                                                                                                                                                                                                                                                                                         |
|--|------------------------------|-------|-------|----|-------|-----------------------------------------------------------------------------------------------------------------------------------------------------------------------------------------------------------------------------------------------------------------------------------------|
|  | 1459.56<br>H5N2F1<br>8.4     |       |       |    | +++   | Key fragments: 608, 1151 (loss of 308)<br>Co-elution with <i>pmk-1</i><br>resistant to $\alpha$ -galactosidase and to J.B. mannosidase;<br>sensitive to $\beta$ -galactosidase (-2H),<br>then MS/MS frag. 446,<br>then sensitive to $\alpha$ 1,2/3 mannosidase (-1H) <b>Fig. 7K-M</b>   |
|  | 1459.56<br>H5N2F1<br>9.0     |       |       |    | ++++  | Key fragments: 608, 1151 (loss of 308)<br>sensitive to $\alpha$ -galactosidase (-1H);<br>sensitive to $\beta$ -galactosidase (-2H),<br>then MS/MS frag. 446<br><b>Fig. 7N-P</b>                                                                                                         |
|  | 1459.56<br>H5N2F1<br>16.5    |       |       |    | +     | Key fragments: 608, 1151 (loss of 308)<br>Co-elution with <i>pmk-1</i><br>sensitive to J.B. mannosidase (-1H)                                                                                                                                                                           |
|  | 1459.56<br>H5N2F1<br>17      |       |       |    | trace | Key fragments: 770, 989 (loss of 470)                                                                                                                                                                                                                                                   |
|  | 1471.59<br>H4N2F2Me2<br>3.4  |       | +     |    |       | Key fragments: 446, 1325<br>Only found in PNGase A released pool.<br>Co-elution with <i>pmk-1</i> strain PNGase A released<br>resistant to J.B. mannosidase and $\alpha$ -galactosidase                                                                                                 |
|  | 1471.59<br>H4N2F2Me2<br>6.0  |       |       | +  |       | Key fragments: trace 608 due to re-arrangement,<br>1163 (loss of 308), 987 ;<br><b>MS/MS Suppl. 2C</b>                                                                                                                                                                                  |
|  | 1471.59<br>H4N2F2Me2<br>10.0 |       |       |    | trace | Key fragments: 608, 1163 (loss of 308),<br>resistant to Bov. $\alpha$ -fucosidase;<br>sensitive to $\beta$ -galactosidase (-1H),<br>then MS/MS frag. 446;                                                                                                                               |
|  | 1473.57<br>H5N2F1Me1<br>5.2  | trace |       | +  | ++    | Key fragments: 300, 503 (no core F), 987<br>Co-elution with F168 and <i>pmk-1</i> strains<br>resistant to Bov. $\alpha$ -fucosidase and to J.B. mannosidase<br>sensitive to $\alpha$ -galactosidase (-1H);<br>sensitive to HF (-160),<br>then sensitive to $\beta$ -galactosidase (-1H) |
|  | 1475.55<br>H6N2<br>5.6       | +     |       | +  | +     | Key fragment: 827<br>Co-elution with <i>Pristionchus</i> , F168 and <i>pmk-1</i> strains<br>sensitive to J.B. mannosidase (-5H)                                                                                                                                                         |
|  | 1475.55<br>H6N2<br>5.9       | ++    | trace | ++ | ++    | Key fragment: 989<br>Co-elution with <i>Pristionchus</i> , F168 and <i>pmk-1</i> strains<br>sensitive to J.B. mannosidase (-5H)                                                                                                                                                         |

|  |                                                    |   |  |   |       |                                                                                                                                                                                                                                                                                                      |
|--|----------------------------------------------------|---|--|---|-------|------------------------------------------------------------------------------------------------------------------------------------------------------------------------------------------------------------------------------------------------------------------------------------------------------|
|  | 1475.55<br>H6N2<br>7.8                             | + |  | + |       | Key fragment: 827<br>Co-elution with <i>pmk-1</i> strain                                                                                                                                                                                                                                             |
|  | 1485.61<br>H4N2F2Me3<br>5.2                        |   |  | + |       | Key fragments: 177, 446, 1339<br>Only found in PNGase A released pool.<br>sensitive to HF (-160 and -146)                                                                                                                                                                                            |
|  | 1485.61<br>H4N2F2Me3<br>10.6                       |   |  | + |       | Key fragments: 177, 446, 1339<br>Only found in PNGase A released pool.                                                                                                                                                                                                                               |
|  | 1485.61<br>H4N2F2Me3<br>>17                        |   |  |   | +     | Key fragments: 177, 339, trace 446 due to re-arrangement,<br>1017, 1339 (loss of 146);<br><b>MS/MS Suppl. 2D</b>                                                                                                                                                                                     |
|  | 1499.62<br>H4N2F2Me4<br>>17                        |   |  |   | +     | Key fragments: 177, 339, 460, 663, 1339;<br><b>MS/MS Suppl. 2E</b>                                                                                                                                                                                                                                   |
|  | 1500.58<br>H4N3F1<br>14.0                          |   |  |   | +     | Key fragments: 608, 1192 (loss of 308)<br>Co-elution with <i>hex-2;hex-3</i> and <i>pmk-1</i> strains<br>resistant to $\alpha$ -galactosidase<br>resistant to $\alpha$ 1,2/3 mannosidase;<br>sensitive to $\beta$ -galactosidase (-1H), then MS/MS frag. 446;<br>sensitive to J.B. mannosidase (-1H) |
|  | 1500.58<br>H4N3F1<br>>17                           |   |  |   | trace | Key fragment: 608, 1192 (loss of 308) <b>MS/MS Suppl. 2F</b><br>Co-elution with <i>pmk-1</i> strain<br>sensitive to J.B. mannosidase (-1H)                                                                                                                                                           |
|  | 1503.59<br>H3N3F1PC1<br>12.6                       |   |  |   | ++    | Key fragments: 369, 531, 1058 (loss of 445)<br>Co-elution with <i>Pristionchus</i> and <i>pmk-1</i> strain                                                                                                                                                                                           |
|  | 1503.59<br>H3N3F1PC1<br>>17                        |   |  |   | +     | Key fragments: 369, 531, 1058 (loss of 445)<br>Co-elution with <i>Pristionchus</i> and <i>pmk-1</i> strain<br>sensitive to $\alpha$ 1,2/3 mannosidase (-1H)                                                                                                                                          |
|  | 1516.58<br>H5N3<br>7.1                             | + |  | + | +     | Key fragments: 365, 1030<br>Co-elution with <i>hex-2;hex-3</i> , <i>pmk-1</i> and F168 strains<br>resistant to $\alpha$ -galactosidase, $\beta$ -galactosidase and<br>Bov. $\alpha$ -fucosidase<br>sensitive to J.B. mannosidase (-3H)                                                               |
|  | 1541.61<br>H3N4F1<br>(GnGnF <sup>6</sup> )<br>15.0 |   |  |   | +++   | Key fragments: 365, 446, 1030, 1192<br>Co-elution with <i>Pristionchus</i> and <i>pmk-1</i> strain                                                                                                                                                                                                   |

|  |                              |    |   |    |       |                                                                                                                                                                                                                                                              |
|--|------------------------------|----|---|----|-------|--------------------------------------------------------------------------------------------------------------------------------------------------------------------------------------------------------------------------------------------------------------|
|  | 1560.61<br>H3N4PC1<br>10.2   | ++ |   | ++ | +     | Key fragments: 369, 531<br>Co-elution with <i>Pristionchus</i> and F168 strain                                                                                                                                                                               |
|  | 1598.63<br>H3N5<br>6.5       | +  |   | ++ | trace | Key fragments: 569, 1030<br>Co-elution with <i>Pristionchus</i> , F168, <i>pmk-1</i> and <i>hex-2;hex-3</i> strains                                                                                                                                          |
|  | 1603.64<br>H4N2F3Me<br>11.5  |    |   |    | trace | Key fragments: 768, 1135 (loss of 468)<br><b>MS/MS Suppl. 2H</b>                                                                                                                                                                                             |
|  | 1603.64<br>H4N2F3Me<br>15.0  |    |   |    | trace | Key fragments: 754, 1149 (loss of 454);<br><b>MS/MS Suppl. 2G</b>                                                                                                                                                                                            |
|  | 1605.61<br>H5N2F2<br>2.8     |    | + |    |       | Key fragments: 446, 1459<br>Only found in PNGase A released pool.<br>Co-elution with <i>pmk-1</i> PNGase A released sensitive to $\alpha$ -galactosidase (-1H)                                                                                               |
|  | 1605.61<br>H5N2F2<br>5.5     |    |   | ++ |       | Key fragments: trace 608 due to re-arrangement, 1297 (loss of 308)<br>Co-elution with <i>pmk-1</i> strain resistant to $\beta$ -galactosidase and J.B. mannosidase; sensitive to $\alpha$ -galactosidase (-1H); sensitive to Bov. $\alpha$ -fucosidase (-1F) |
|  | 1605.61<br>H5N2F2<br>6.7     |    |   |    | ++    | Key fragments: 446, 1459<br>Co-elution with <i>pmk-1</i> strain sensitive to $\alpha$ -galactosidase (-1H); sensitive to Bov. $\alpha$ -fucosidase (-1F), then MS/MS frag. 300, 503 (no core Fuc)                                                            |
|  | 1605.61<br>H5N2F2<br>7.7     |    |   |    | +++   | Key fragments: 608, 1297 (loss of 308)<br>Co-elution with <i>pmk-1</i> strain resistant to $\alpha$ -galactosidase; sensitive to $\beta$ -galactosidase (-1H), then MS/MS frag. 446;                                                                         |
|  | 1605.61<br>H5N2F2<br>9.4     |    |   |    | ++++  | Key fragments: 608, 1297 (loss of 308)<br>Co-elution with <i>pmk-1</i> strain resistant to J.B. mannosidase; sensitive to $\alpha$ -galactosidase (-1H)<br><b>Fig. 9A-C</b>                                                                                  |
|  | 1605.61<br>H5N2F2<br>15.0    |    |   |    | trace | Key fragments: 770, 1135 (loss of 470)                                                                                                                                                                                                                       |
|  | 1617.65<br>H4N2F3Me2<br>12.6 |    |   |    | trace | Key fragments: 768, 1149 (loss of 468);<br><b>MS/MS Suppl. 2I</b><br>resistant to J.B. mannosidase, $\alpha$ -galactosidase, $\beta$ -galactosidase and $\alpha$ 1,2 fucosidase                                                                              |







|  |                                   |     |   |    |       |                                                                                                                                                                                                                                                                                                                                                                                 |
|--|-----------------------------------|-----|---|----|-------|---------------------------------------------------------------------------------------------------------------------------------------------------------------------------------------------------------------------------------------------------------------------------------------------------------------------------------------------------------------------------------|
|  | 1779.70<br>H5N2F3Me2<br>12.6      |     |   |    | +++   | Key fragments: 768, 987, 1311 (loss of 468)<br>resistant to J.B. mannosidase and $\alpha$ 1,6 mannosidase;<br>sensitive to $\alpha$ -galactosidase (-1H);<br>sensitive to HF (-2x160) MS/MS then 608,<br>then resistant to J.B. mannosidase,<br>but sensitive to $\beta$ -galactosidase (-2H), MS/MS then 446,<br>then resistant to $\alpha$ 1,2/3 mannosidase <b>Fig. 9G-I</b> |
|  | 1781.68<br>H6N2F2Me1<br>9.4       |     |   |    | +++   | Key fragments: 608, 1473 (loss of 308)<br>Co-elution with <i>pmk-1</i> strain<br>resistant to Bov. $\alpha$ -fucosidase;<br>sensitive to $\beta$ -galactosidase (-1H), then MS/MS frag. 446;<br>sensitive to $\alpha$ -galactosidase (-1H)<br>sensitive to HF (-160),<br>then sensitive to $\beta$ -galactosidase (-2H)<br>then MS/MS frag. 446; <b>Fig. 9A-C</b>               |
|  | 1781.68<br>H6N2F2Me1<br>10.2      |     |   |    | +     | Key fragments: 770, 1311 (loss of 470);<br><b>MS/MS Suppl. 2Q</b><br>sensitive to $\beta$ -galactosidase (-2H),<br>then MS/MS frag. 446;<br>sensitive to $\alpha$ -galactosidase (-1H)                                                                                                                                                                                          |
|  | 1781.68<br>H6N2F2Me1<br>11.5      |     |   |    | trace | Key fragments: 768, 1313 (loss of 468)                                                                                                                                                                                                                                                                                                                                          |
|  | 1783.66<br>H7N2F1<br>9.0          |     |   |    | +     | Key fragments: 770, 1313 (loss of 470)<br>sensitive to $\alpha$ -galactosidase (-1H)                                                                                                                                                                                                                                                                                            |
|  | 1799.66<br>H8N2<br>(Man8B)<br>4.6 | +++ | + | ++ | +++   | Key fragment: 1151<br>Co-elution with <i>Pristionchus</i> , <i>pmk-1</i> and F168 strains                                                                                                                                                                                                                                                                                       |
|  | 1799.66<br>H8N2<br>(Man8A)<br>5.2 | +   |   | +  | +     | Key fragment: 989<br>Co-elution with <i>Pristionchus</i> , <i>pmk-1</i> and F168 strains                                                                                                                                                                                                                                                                                        |
|  | 1868.72<br>H4N4F1PC1<br>17        |     |   |    | trace | Key fragments: 369; 531, 1261 (loss of 607)<br>Co-elution with <i>pmk-1</i> strain<br>sensitive to HF (-165), MS/MS then 608                                                                                                                                                                                                                                                    |
|  | 1871.72<br>H3N4F1PC2<br>>17       |     |   |    | ++    | Key fragments: 369, 531, 1426 (loss of 445)<br>Co-elution with <i>Pristionchus</i> and <i>pmk-1</i>                                                                                                                                                                                                                                                                             |
|  | 1913<br>H6N2F3<br>14.0            |     |   |    | +     | Key fragments: 754, 1459 (loss of 454)<br>sensitive to $\alpha$ -galactosidase (-1H)                                                                                                                                                                                                                                                                                            |

|  |                                  |       |   |    |       |                                                                                                                                                                                |
|--|----------------------------------|-------|---|----|-------|--------------------------------------------------------------------------------------------------------------------------------------------------------------------------------|
|  | 1927.74<br>H6N2F3Me<br>16.5      |       |   |    | +     | Key fragments: 754, 1473 (loss of 454);<br><b>MS/MS Suppl. 2R</b><br>sensitive to $\alpha$ -galactosidase (-1H)                                                                |
|  | 1929.72<br>H7N2F2<br>8.4         |       |   |    | +     | Key fragments: 770, 1459 (loss of 470)<br>sensitive to $\beta$ -galactosidase (-2H),<br>then MS/MS frag. 446;<br>sensitive to $\alpha$ -galactosidase (-1H)                    |
|  | 1941.76<br>H6N2F3Me2<br>11.5     |       |   |    | +     | Key fragments: 768, 1473 (loss of 468);<br><b>MS/MS Suppl. 2S</b>                                                                                                              |
|  | 1943.74<br>H7N2F2Me1<br>9.4      |       |   |    | trace | Key fragments: 770, 1473 (loss of 470)<br><b>MS/MS Suppl. 2T</b><br>sensitive to $\beta$ -galactosidase (-2H)<br>then MS/MS 446;<br>sensitive to $\alpha$ -galactosidase (-1H) |
|  | 1961.71<br>H9N2<br>(Man9)<br>4.9 | +++   | + | ++ | +++   | Key fragment: 1151<br>Co-elution with <i>Pristionchus</i> , <i>pmk-1</i> and F168 strains                                                                                      |
|  | 2123.76<br>H10N2<br>5.9          | trace |   | +  | +     | Key fragment: 1313<br>Co-elution with <i>Pristionchus</i> , <i>pmk-1</i> and F168 strains                                                                                      |
